# Supplementary material for: Water-based synthesis of keratin micro- and nanoparticles with tunable mucoadhesive properties for drug delivery
Source: Royal Society of Chemistry journal article supplement (doi:10.1039/c9tb00443b), 2019-01-01
Supplement: c9tb00443b1.pdf [file c9tb00443b1.pdf]

Electronic Supporting Information for

## All-water synthesis of keratin micro-nano particles with tunable mucoadhesive properties for drug delivery

Giovanni Perotto,<sup>a\*</sup> Giuseppina Sandri,<sup>b</sup> Cataldo Pignatelli,<sup>a</sup> Giulia Milanese<sup>b</sup> and Athanassia Athanassiou<sup>a\*</sup>

a – Smart Materials Group, Istituto Italiano di Tecnologia, via Morego 30, 16163, Genova, Italy.

Email: giovanni.perotto@iit.it ; athanassia.athanassiou@iit.it

b – Department of Drug Sciences, University of Pavia, Viale Taramelli 12, 27100, Pavia, Italy

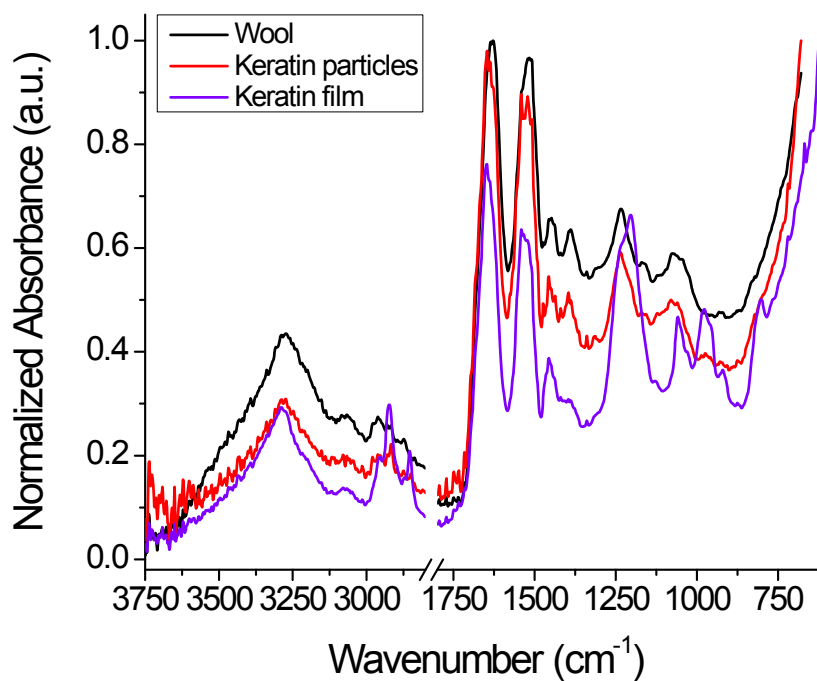

**Figure S1:** FTIR spectra of the wool from which the keratin was extracted, the synthesized keratin particles and a keratin film obtained by casting of the keratin solution.

| <b>Model drug</b> | <b>Molecular Weight (Da)</b> | <b>Charge at pH 6.5</b> | <b>LogP</b> |
|-------------------|------------------------------|-------------------------|-------------|
| Albumin-FITC      | 70000                        | Slightly negative       | 1.18        |
| Curcumin          | 368.38                       | Neutral                 | 2.56        |
| Carminic Red      | 492.389                      | Negative                | 1.53        |
| Eosin             | 647.89                       | Negative                | -0.18       |
| Methylene Blue    | 319.85                       | Positive                | -0.9        |
| Au NP             | n.d.                         | n.d.                    | n.d.        |

**Table S1:** molecular weight, charge at pH 6.5 and partition coefficient (logP) for the different model drugs.

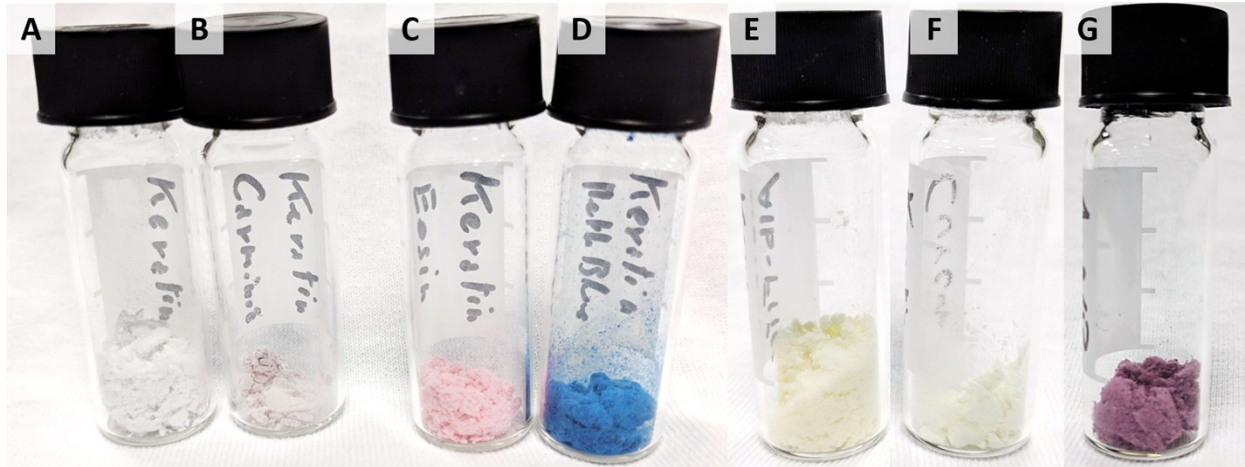

**Figure S2:** Lyophilized keratin particles. A) unloaded; B) loaded with carminic acid; C) loaded with eosin; D) loaded with methylene blue; E) loaded with albumin-FITC; F) loaded with curcumin; G) loaded with gold nanoparticles.

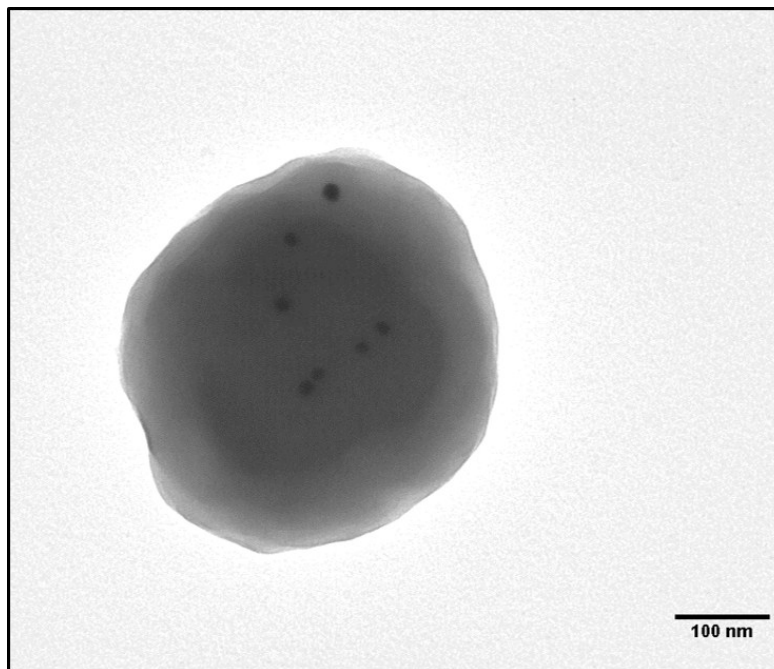

**Figure S3:** TEM picture showing gold nanoparticles successfully encapsulated inside a keratin particle.

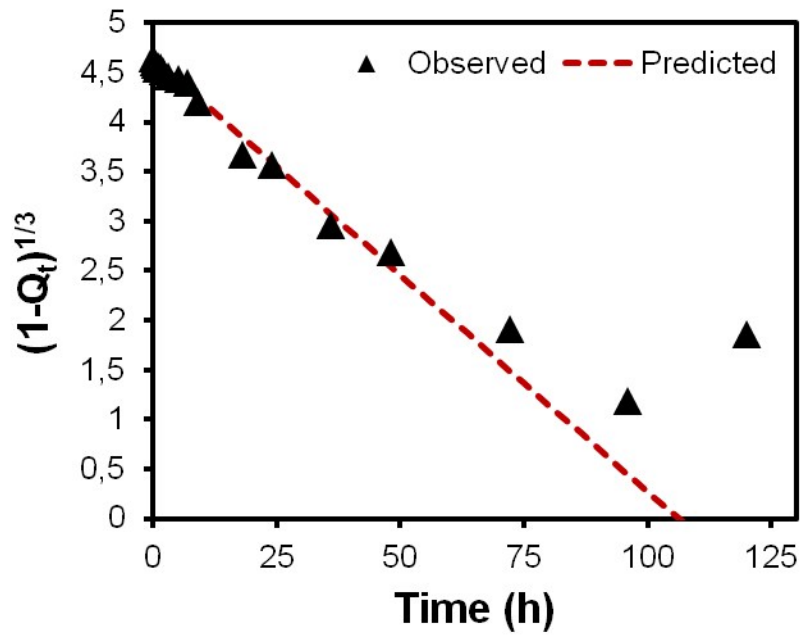

**Figure S4:** Hixson-Crowell fitting of the release data of Albumin FITC from the keratin particles.

Fit results are:  $K_{HC}=0.009$ ,  $r^2 = 0.9919$ .
